# Supplementary material for: Prevalence of High Tumor Mutational Burden and Association With Survival in Patients With Less Common Solid Tumors
Source: PubMed Central journal article supplement — JAMA Netw Open. 2020 Oct 29;3(10):e2025109. doi: 10.1001/jamanetworkopen.2020.25109 (PMC7596577; doi:10.1001/jamanetworkopen.2020.25109), 2020-10-29

## Supplemental Online Content

Shao C, Li G, Huang L, et al. Prevalence of high tumor mutational burden and association with survival in patients with less common solid tumors. *JAMA Network Open*. 2020;3(10):e2025109. doi:10.1001/jamanetworkopen.2020.25109

### **eFigure.** Patient Selection for Primary Analysis Population

This supplemental material has been provided by the authors to give readers additional information about their work.

## eFigure. Patient Selection for Primary Analysis Population

Eligible patients were sourced using the Flatiron Health–FMI CGDB with data collected up to Jul 31, 2018. TMB assessment was performed on FFPE tumor tissue specimens using the F1 or F1CDx platform. TMB-H was defined as  $\geq 10$  Mut/Mb. CGDB, Clinico-Genomic Database; F1CDx, FoundationOne Companion Diagnostic; FFPE, formalin fixed and paraffin embedded; FMI, Foundation Medicine, Inc.; KN-158, KEYNOTE-158 study; MSI-H, high microsatellite instability; TMB, tumor mutational burden; TMB-H, high TMB.

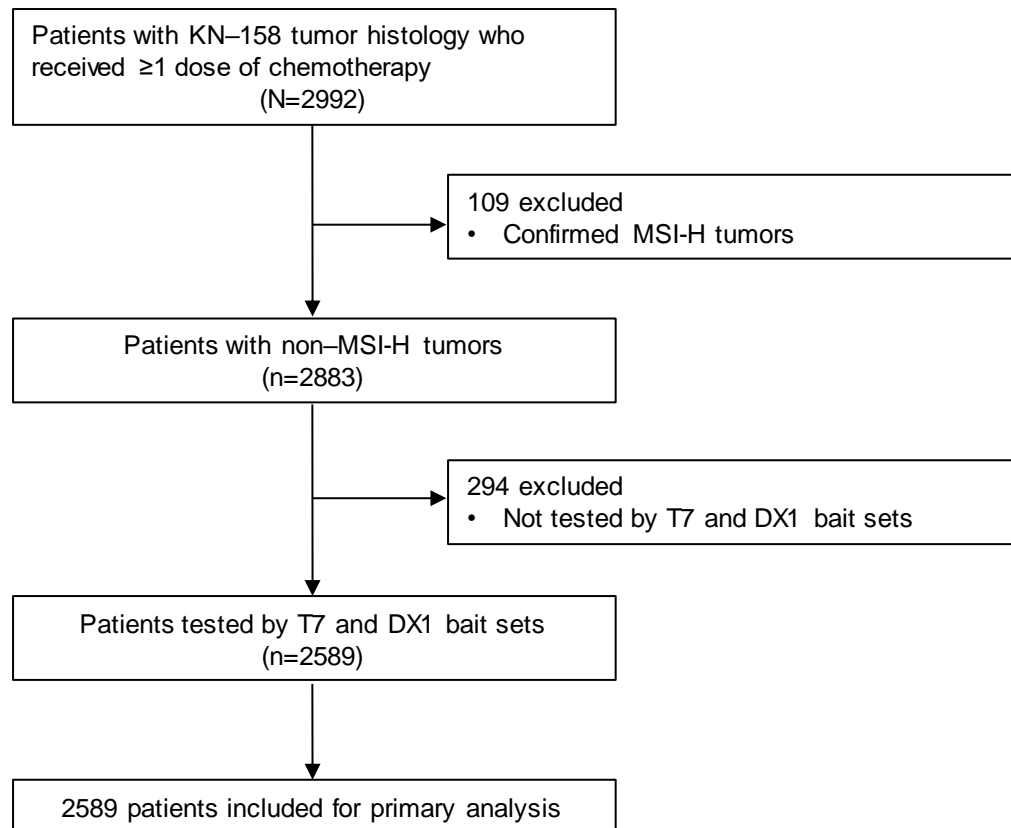

Supplement: jamanetwopen-e2025109-s001.pdf [file jamanetwopen-e2025109-s001.pdf]
